# Supplementary material for: Theoretical analysis of the absorption of CO2 and CO on pristine and Al-doped C3B
Source: Royal Society of Chemistry journal article supplement (doi:10.1039/d2cp04181b), 2022-01-01
Supplement: d2cp04181b1.pdf [file d2cp04181b1.pdf]

## Electronic Supplementary Information

Theoretical analysis of the absorption of CO<sub>2</sub> and CO on pristine and Al-doped C<sub>3</sub>B

Lu-Qi Tao ,Simin Zou<sup>\*</sup> , Guanya Wang ,Zhirong Peng , Congcong Zhu and Hao Sun

[siminzou1998@cqu.edu.cn](mailto:siminzou1998@cqu.edu.cn)

**Table S1**      The change in lattice constant

| Material     | Lattice constants calculated using PBE | Lattice constants calculated using PBEsol |
|--------------|----------------------------------------|-------------------------------------------|
| C3B          | $a = b = 10.355 \text{ \AA}$           | $a = b = 10.321 \text{ \AA}$              |
| Al-doped C3B | $a = b = 10.536 \text{ \AA}$           | $a = b = 10.501 \text{ \AA}$              |

**Note 1**      From the results in **Table S1**, we can find that the lattice constant slightly increases after the introduction of Al doping in the PBE function calculations. It is due to the fact that the atomic radius of the AL element is larger than that of the B element and the stretching lattice strain occurs during doping, such a phenomenon is also observed in the al-doped BN.<sup>1</sup> Moreover, since the PBEsol function is more accurate in the calculation of the structural parameters, we used PBEsol to re-optimize both structures. The obtained lattice parameters showed no significant difference from the results of the PBE function and also show a trend of increasing lattice constants after al-doping.

**Table S2** Atomic coordinates in C3B

|    | Atom | X(Å)      | Y(Å)     | Z(Å)     |
|----|------|-----------|----------|----------|
| 1  | C    | 2.577564  | 3.045200 | 8.521425 |
| 2  | C    | 1.229125  | 0.709636 | 8.521425 |
| 3  | C    | 3.926002  | 0.709636 | 8.521425 |
| 4  | C    | 0.000000  | 1.419272 | 8.521425 |
| 5  | C    | 1.348438  | 3.754835 | 8.521425 |
| 6  | C    | -1.348438 | 3.754835 | 8.521425 |
| 7  | B    | 2.577564  | 1.488157 | 8.521425 |
| 8  | B    | 0.000000  | 2.976314 | 8.521425 |
| 9  | C    | 7.732691  | 3.045200 | 8.521425 |
| 10 | C    | 6.384252  | 0.709636 | 8.521425 |
| 11 | C    | 9.081129  | 0.709636 | 8.521425 |
| 12 | C    | 5.155127  | 1.419272 | 8.521425 |
| 13 | C    | 6.503566  | 3.754835 | 8.521425 |
| 14 | C    | 3.806689  | 3.754835 | 8.521425 |
| 15 | B    | 7.732691  | 1.488157 | 8.521425 |
| 16 | B    | 5.155127  | 2.976314 | 8.521425 |
| 17 | C    | 0.000000  | 7.509671 | 8.521425 |
| 18 | C    | -1.348438 | 5.174107 | 8.521425 |
| 19 | C    | 1.348438  | 5.174107 | 8.521425 |
| 20 | C    | -2.577564 | 5.883743 | 8.521425 |
| 21 | C    | -1.229125 | 8.219306 | 8.521425 |
| 22 | C    | -3.926002 | 8.219306 | 8.521425 |
| 23 | B    | 0.000000  | 5.952628 | 8.521425 |
| 24 | B    | -2.577564 | 7.440785 | 8.521425 |
| 25 | C    | 5.155127  | 7.509471 | 8.521425 |
| 26 | C    | 3.806689  | 5.174107 | 8.521425 |
| 27 | C    | 6.503566  | 5.174107 | 8.521425 |
| 28 | C    | 2.577564  | 5.883743 | 8.521425 |
| 29 | C    | 3.926002  | 8.219306 | 8.521425 |
| 30 | C    | 1.229125  | 8.219306 | 8.521425 |
| 31 | B    | 5.155127  | 5.952628 | 8.521425 |
| 32 | B    | 2.577564  | 7.440785 | 8.521425 |

**Table S3** Atomic coordinates in Al-doped C3B

|    | Atom | X(Å)      | Y(Å)     | Z(Å)     |
|----|------|-----------|----------|----------|
| 1  | C    | 2.547358  | 3.138213 | 5.189144 |
| 2  | C    | 1.244877  | 0.718730 | 5.189144 |
| 3  | C    | 3.991451  | 0.636970 | 5.189144 |
| 4  | C    | 0.000000  | 1.442694 | 5.189144 |
| 5  | C    | 1.326657  | 3.857980 | 5.189144 |
| 6  | C    | -1.326657 | 3.857890 | 5.189144 |
| 7  | B    | 2.619867  | 1.512581 | 5.189144 |
| 8  | B    | 0.000000  | 3.045603 | 5.189144 |
| 9  | C    | 7.989070  | 3.138213 | 5.189144 |
| 10 | C    | 6.544977  | 0.636970 | 5.189144 |
| 11 | C    | 9.291551  | 0.718730 | 5.189144 |
| 12 | C    | 5.268214  | 1.235204 | 5.189144 |
| 13 | C    | 6.832603  | 3.944805 | 5.189144 |
| 14 | C    | 3.703825  | 3.944805 | 5.189144 |
| 15 | B    | 7.916561  | 1.512581 | 5.189144 |
| 16 | Al   | 5.268214  | 3.041605 | 5.189144 |
| 17 | C    | 0.000000  | 7.652142 | 5.189144 |
| 18 | C    | -1.358736 | 5.298743 | 5.189144 |
| 19 | C    | 1.358736  | 5.298743 | 5.189144 |
| 20 | C    | -2.590433 | 6.046905 | 5.189144 |
| 21 | C    | -1.263776 | 8.344742 | 5.189144 |
| 22 | C    | -4.018804 | 8.403467 | 5.189144 |
| 23 | B    | 0.000000  | 6.083209 | 5.189144 |
| 24 | B    | -2.630644 | 7.602013 | 5.189144 |
| 25 | C    | 5.268214  | 7.687354 | 5.189144 |
| 26 | C    | 3.824121  | 5.349631 | 5.189144 |
| 27 | C    | 6.712307  | 5.349631 | 5.189144 |
| 28 | C    | 2.590433  | 6.046905 | 5.189144 |
| 29 | C    | 4.018804  | 8.403467 | 5.189144 |
| 30 | C    | 1.263776  | 8.344742 | 5.189144 |
| 31 | B    | 5.268214  | 6.099652 | 5.189144 |
| 32 | B    | 2.630644  | 7.602013 | 5.189144 |

**Table S4** Comparison of adsorption energy

| Ref      | Material                    | E <sub>ads</sub> (CO) | E <sub>ads</sub> (CO <sub>2</sub> ) |
|----------|-----------------------------|-----------------------|-------------------------------------|
| 2        | B-N@Graphene                | -0.110 eV             | -0.120 eV                           |
| 3        | MoS <sub>2</sub> -nanotubes | -0.440 eV             | -0.120 eV                           |
| 4        | Au-doped VO <sub>2</sub>    | -0.450 eV             | +0.030 eV                           |
| 5        | β-SnSe                      | -0.202 eV             | -0.175 eV                           |
| 6        | In-doped SnO <sub>2</sub>   | -0.346 eV             | /                                   |
| 7        | SiGe monolayer              | -0.241 eV             | -0.200 eV                           |
| 8        | SnP <sub>3</sub> sheets     | -0.338 eV             | -0.221 eV                           |
| 9        | PtSe <sub>2</sub> monolayer | -0.141 eV             | -0.182 eV                           |
| Our work | Al-doped C <sub>3</sub> B   | -0.401 eV             | -0.590 eV                           |

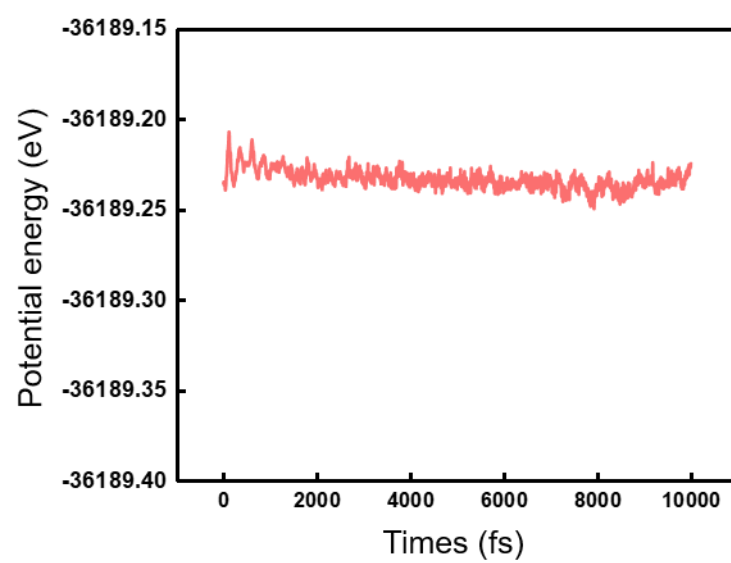

Fig. S1. Energy fluctuation of monolayer Al-C<sub>3</sub>B in molecular dynamics simulations at 300K

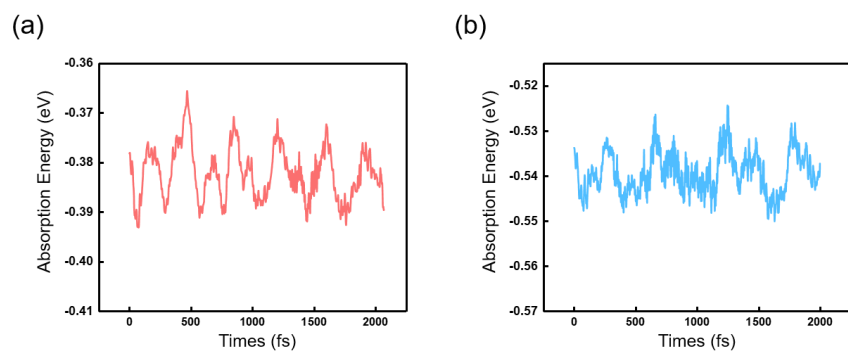

**Fig.S2** Fluctuation of adsorption energy at room temperature (300 K) for (a)CO/Al-C<sub>3</sub>B system (b) CO<sub>2</sub>/Al-C<sub>3</sub>b system.

## Reference

- 1 H. Ahmoum, M. Boughrara and M. Kerouad, Electronic and magnetic properties of Al doped (w – BN) with intrinsic vacancy, *Superlattices Microstruct*, 2019, 127, 186–190.
- 2 I. Choudhuri, N. Patra, A. Mahata, R. Ahuja and B. Pathak, B-N@Graphene: Highly Sensitive and Selective Gas Sensor, *Journal of Physical Chemistry C*, 2015, 119, 24827–24836.
- 3 N. Baildya, N. N. Ghosh and A. P. Chattopadhyay, Environmentally hazardous gas sensing ability of MoS<sub>2</sub>-nanotubes: an insight from the electronic structure and transport properties, *Nanoscale Adv*, 2021, 3, 4528–4535.
- 4 R. Joy, Z. Han, K. Xu, X. Pan, N. Liao and H. Zhou, DFT investigation of gas sensing characteristics of Au-doped vanadium dioxide, *Physics Letters, Section A: General, Atomic and Solid State Physics*, , DOI:10.1016/j.physleta.2020.126823.
- 5 T. Liu, H. Qin, D. Yang and G. Zhang, First principles study of gas molecules adsorption on monolayered  $\beta$ -SnSe, *Coatings*, , DOI:10.3390/COATINGS9060390.
- 6 W. H. Yang, W. C. Lu, X. Y. Xue and Q. J. Zang, A theoretical study on CO sensing mechanism of In-doped SnO<sub>2</sub> (110) surface, *Comput Theor Chem*, 2015, 1069, 119–124.
- 7 X. Sun, K. Liang, F. Dong, Z. Wang and S. Liu, in 2019 20th International Conference on Electronic Packaging Technology, ICEPT 2019, Institute of Electrical and Electronics Engineers Inc., 2019.
- 8 J. Du and G. Jiang, First-principle study on monolayer and bilayer SnP<sub>3</sub> sheets as the potential sensors for NO<sub>2</sub>, NO, and NH<sub>3</sub> detection, *Nanotechnology*, , DOI:10.1088/1361-6528/ab8c04.
- 9 Q. Wu, L. Cao, Y. S. Ang and L. K. Ang, Superior and tunable gas sensing properties of Janus PtSSe monolayer, *Nano Express*, , DOI:10.1088/2632-959X/ab95e6.
